# Supplementary material for: CircRNA_100269 is downregulated in gastric cancer and suppresses tumor cell growth by targeting miR-630
Source: publisher site journal article supplement (doi:10.18632/aging.101254), 2017-06-27

Figure S1 (A) Correlation of expression between linear LPHN2 and circRNA\_100269.  
(B) Correlation of expression between miR-605 and circRNA\_100269.

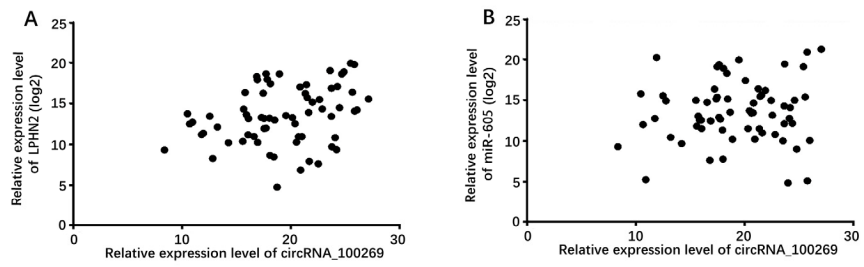

Supplement: Supplementary file 1 [file aging-v9i6-101254-supplementary-material-SD1.pdf]
